# Supplementary material for: Molecular characterization of a tetra segmented ssDNA virus infecting Botrytis cinerea worldwide
Source: Springer Nature journal article supplement (doi:10.1186/s12985-023-02256-z), 2023-12-19
Supplement: MOESM2 [file 26547146]

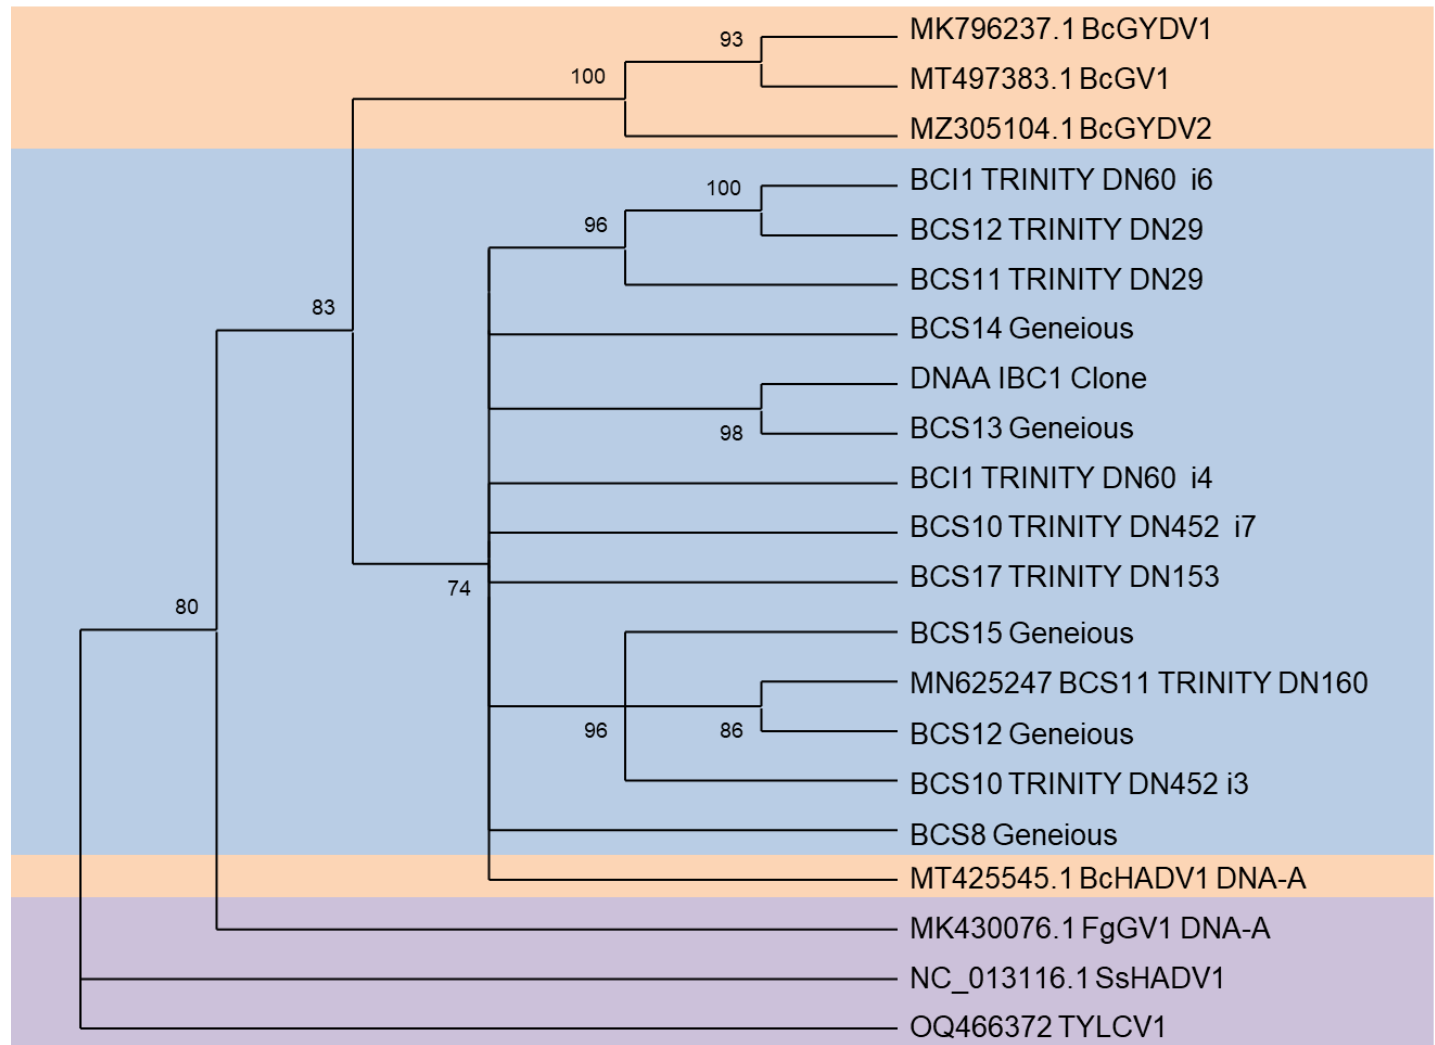

**Figure 1.** Phylogenetic tree based on nucleotide sequences of DNA-A. All bootstrap values (%) are represented at each node of the tree. A consensus tree was constructed from 1000 bootstrap trees (log likelihood of consensus tree: DNA-A, -12981.597)

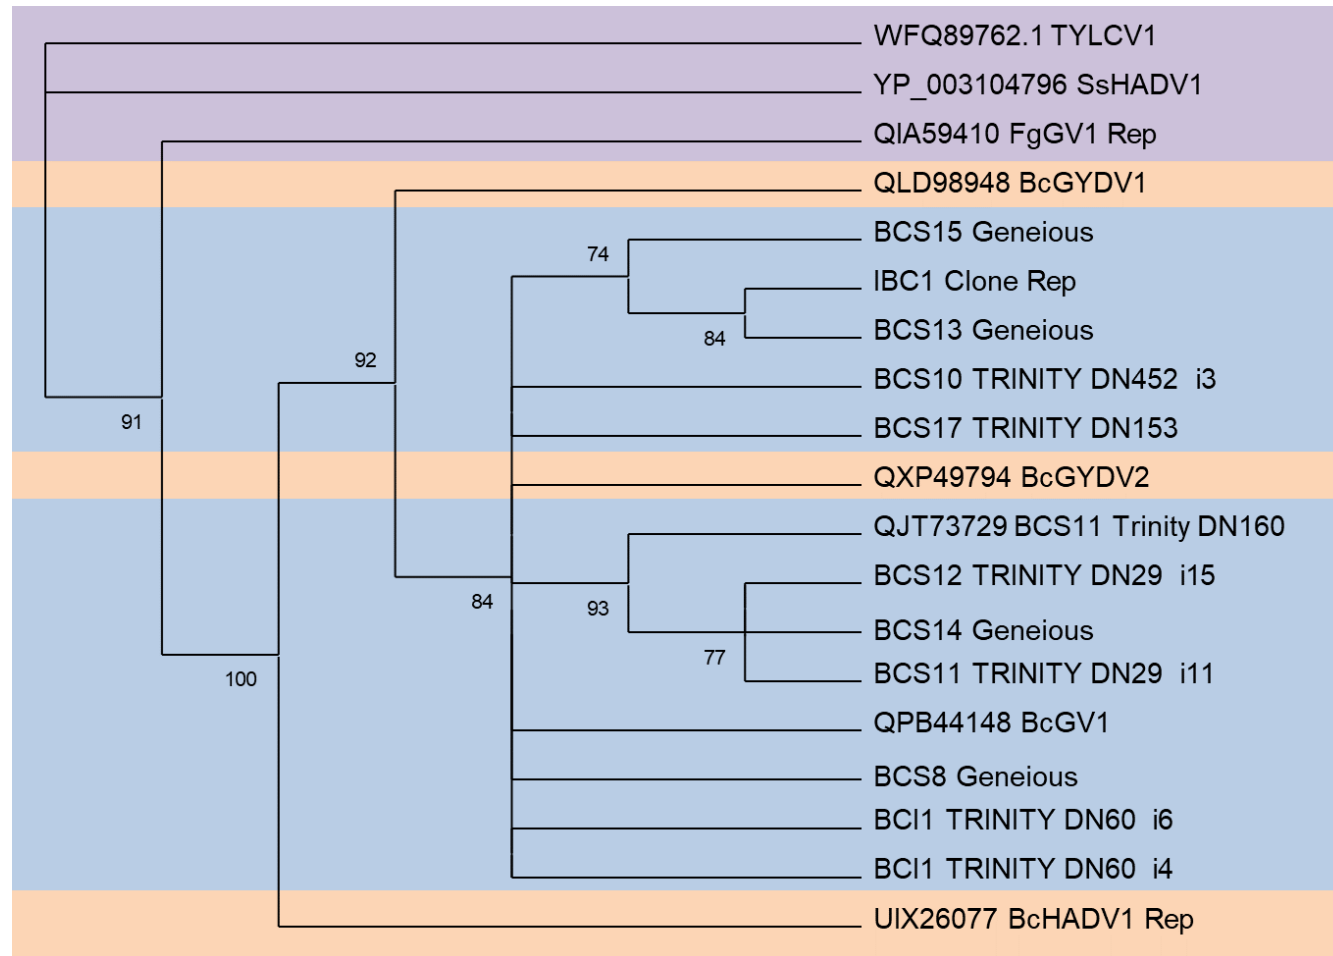

**Figure 2.** Phylogenetic tree based on amino acid sequences of DNA-A. All bootstrap values (%) are represented at each node of the tree. A consensus tree was constructed from 1000 bootstrap trees (log likelihood of consensus tree: DNA-A, -3592.4458)

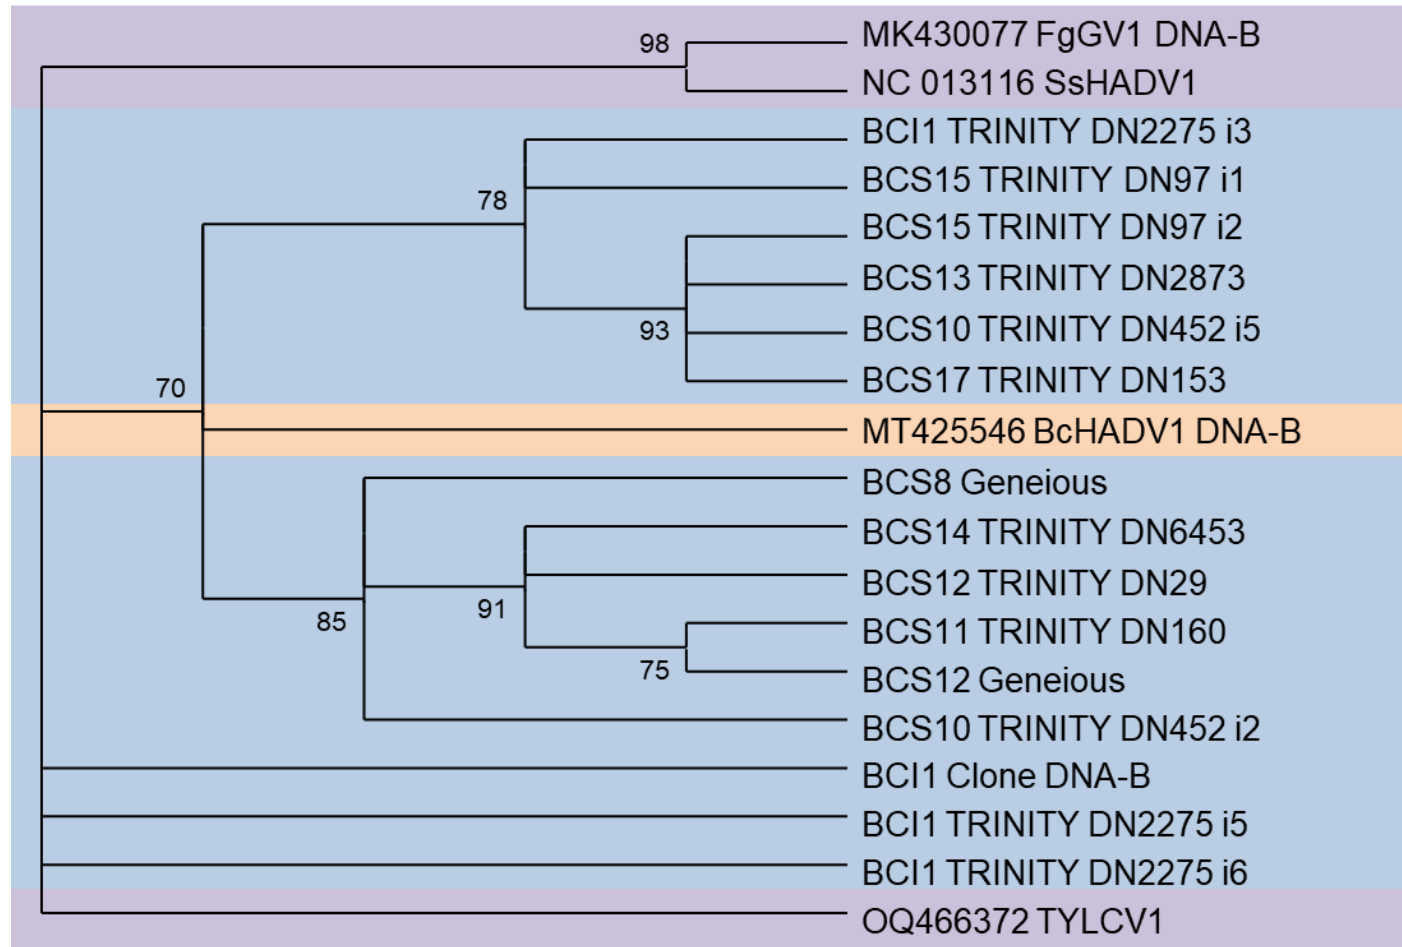

**Figure 3.** Phylogenetic tree based on nucleotide sequences of DNA-B. All bootstrap values (%) are represented at each node of the tree. A consensus tree was constructed from 1000 bootstrap trees (log likelihood of consensus tree: DNA-B, -6841.4621 )

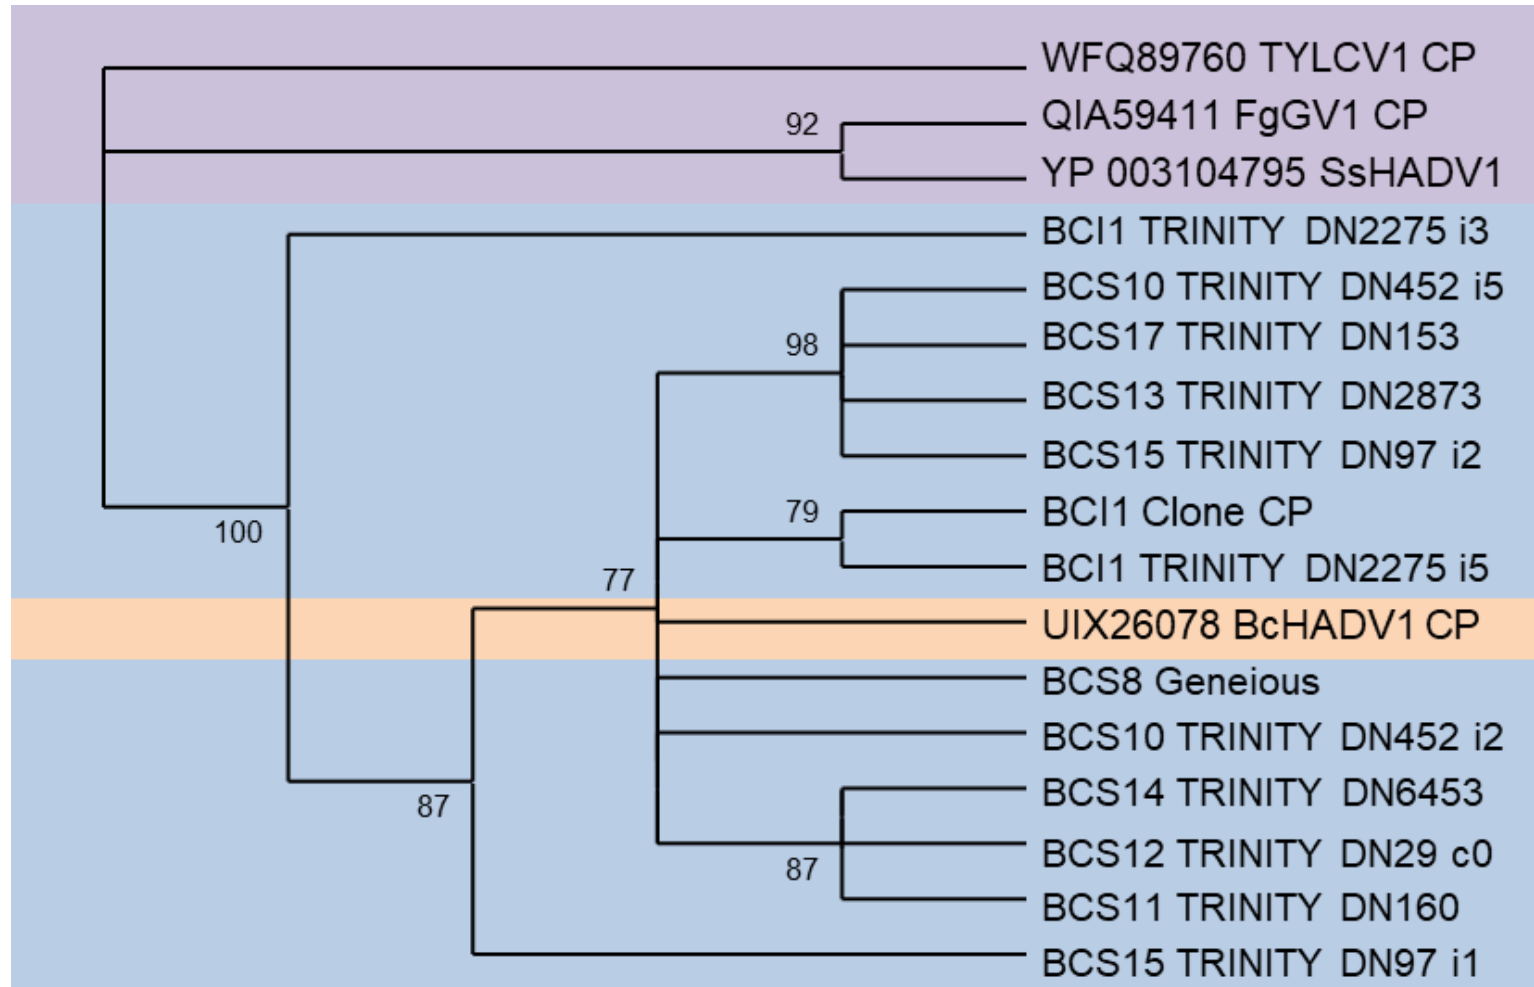

**Figure 4.** Phylogenetic tree based on amino acid sequences of DNA-B. All bootstrap values (%) are represented at each node of the tree. A consensus tree was constructed from 1000 bootstrap trees (log likelihood of consensus tree: DNA-B, -6841.4621 )

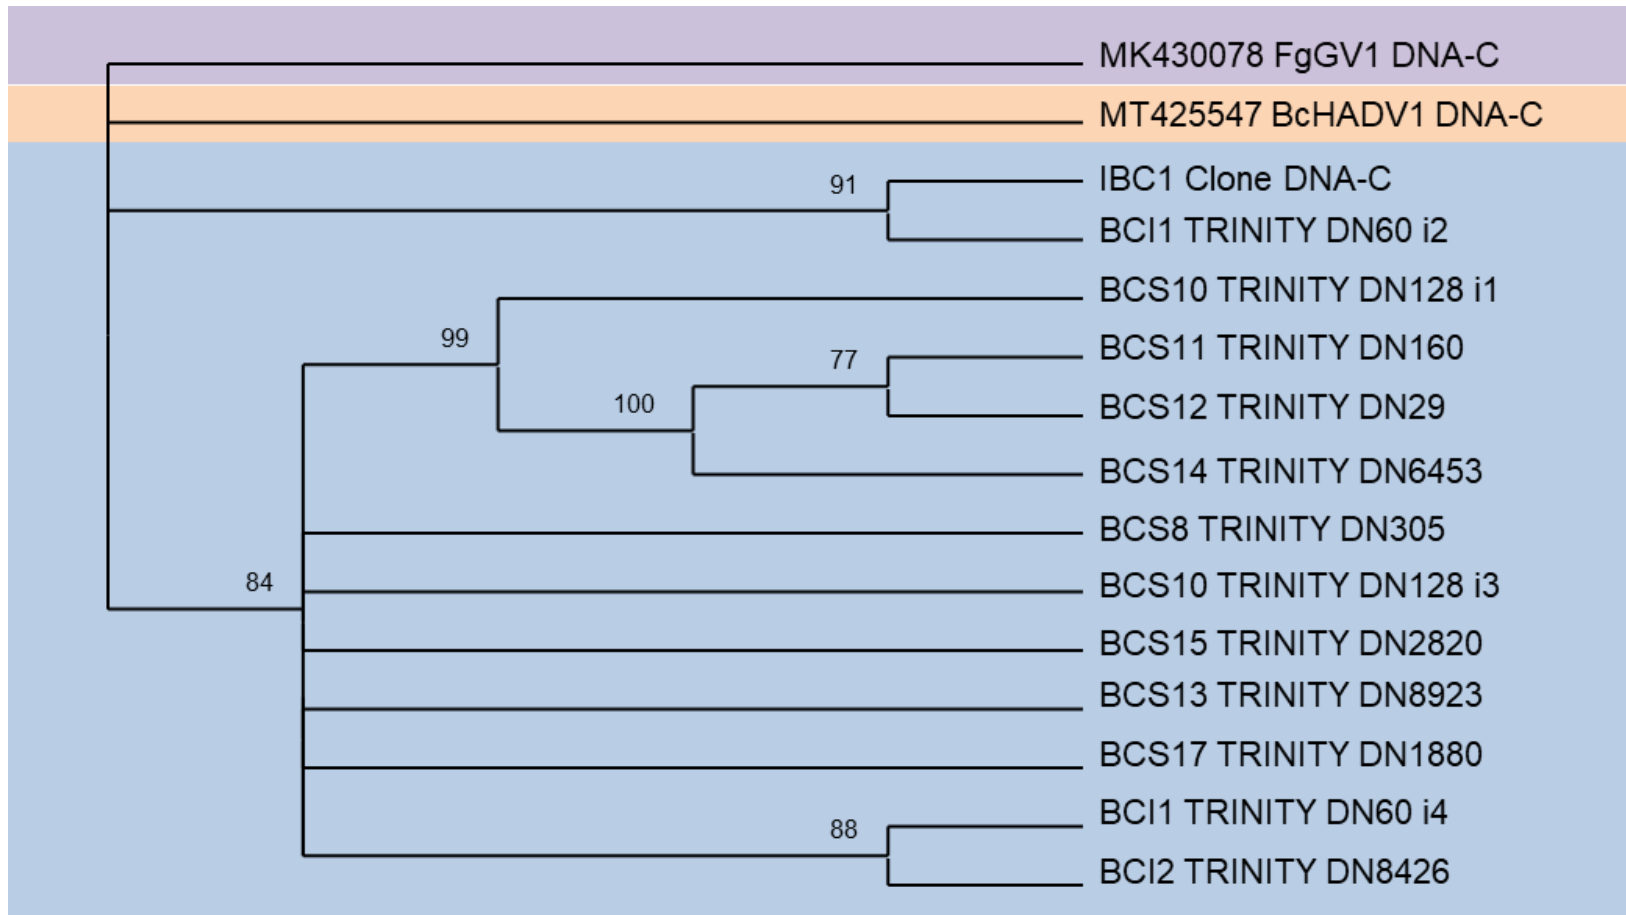

**Figure 5.** Phylogenetic tree based on nucleotide sequences of DNA-C. All bootstrap values (%) are represented at each node of the tree. A consensus tree was constructed from 1000 bootstrap trees (log likelihood of consensus tree: DNA-C, -3104.4721)

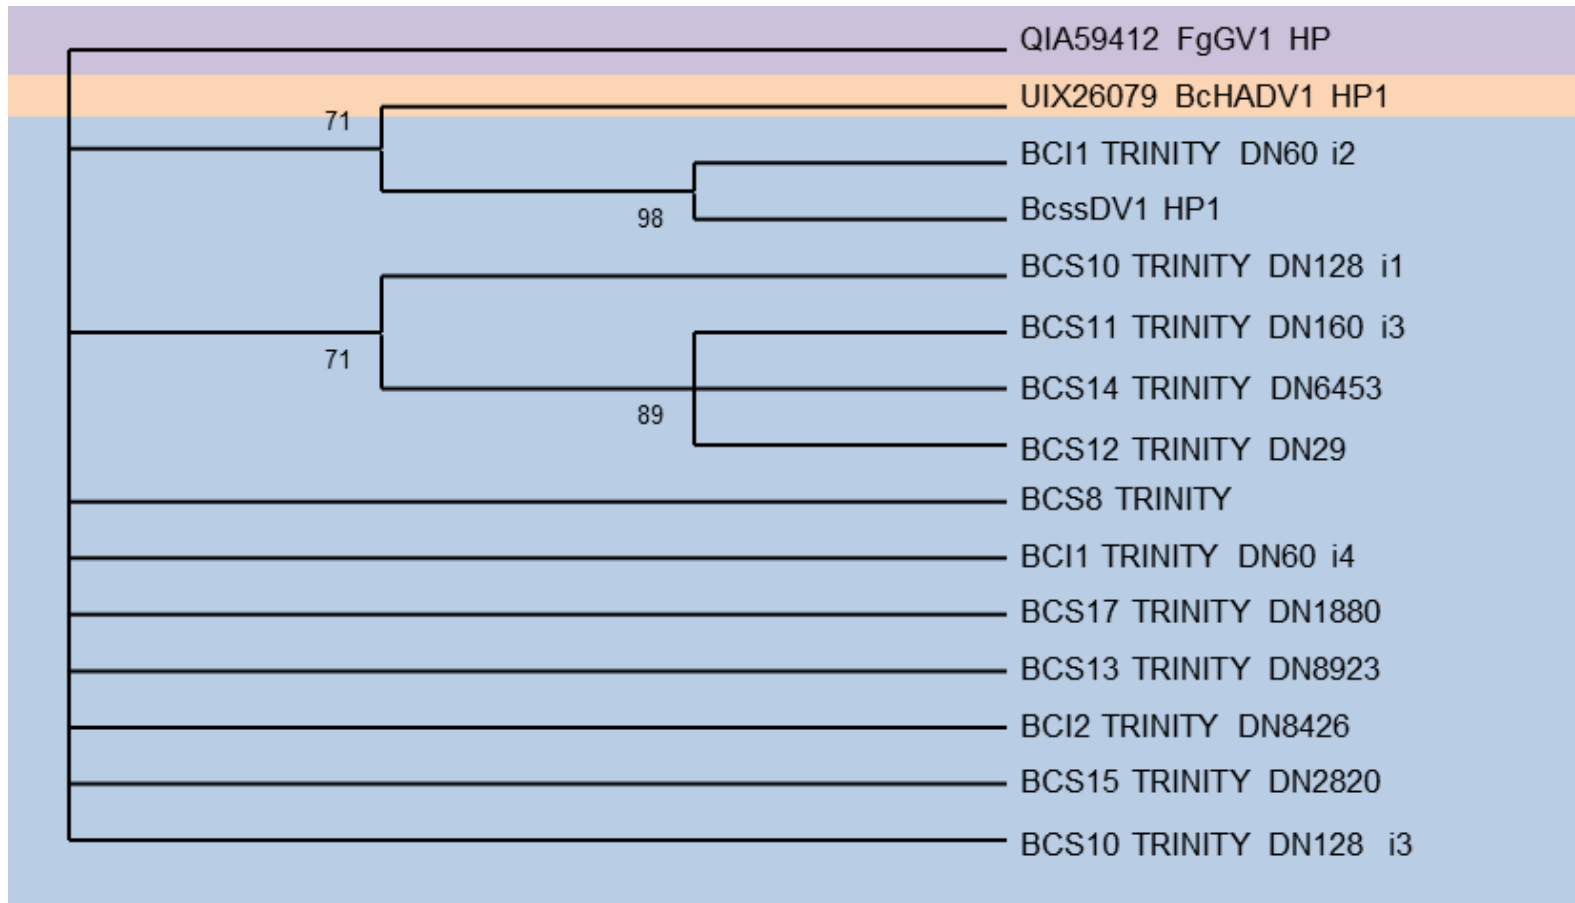

**Figure 6.** Phylogenetic tree based on amino acid sequences of DNA-C. All bootstrap values (%) are represented at each node of the tree. A consensus tree was constructed from 1000 bootstrap trees (log likelihood of consensus tree: DNA-C, -1692.1712 )

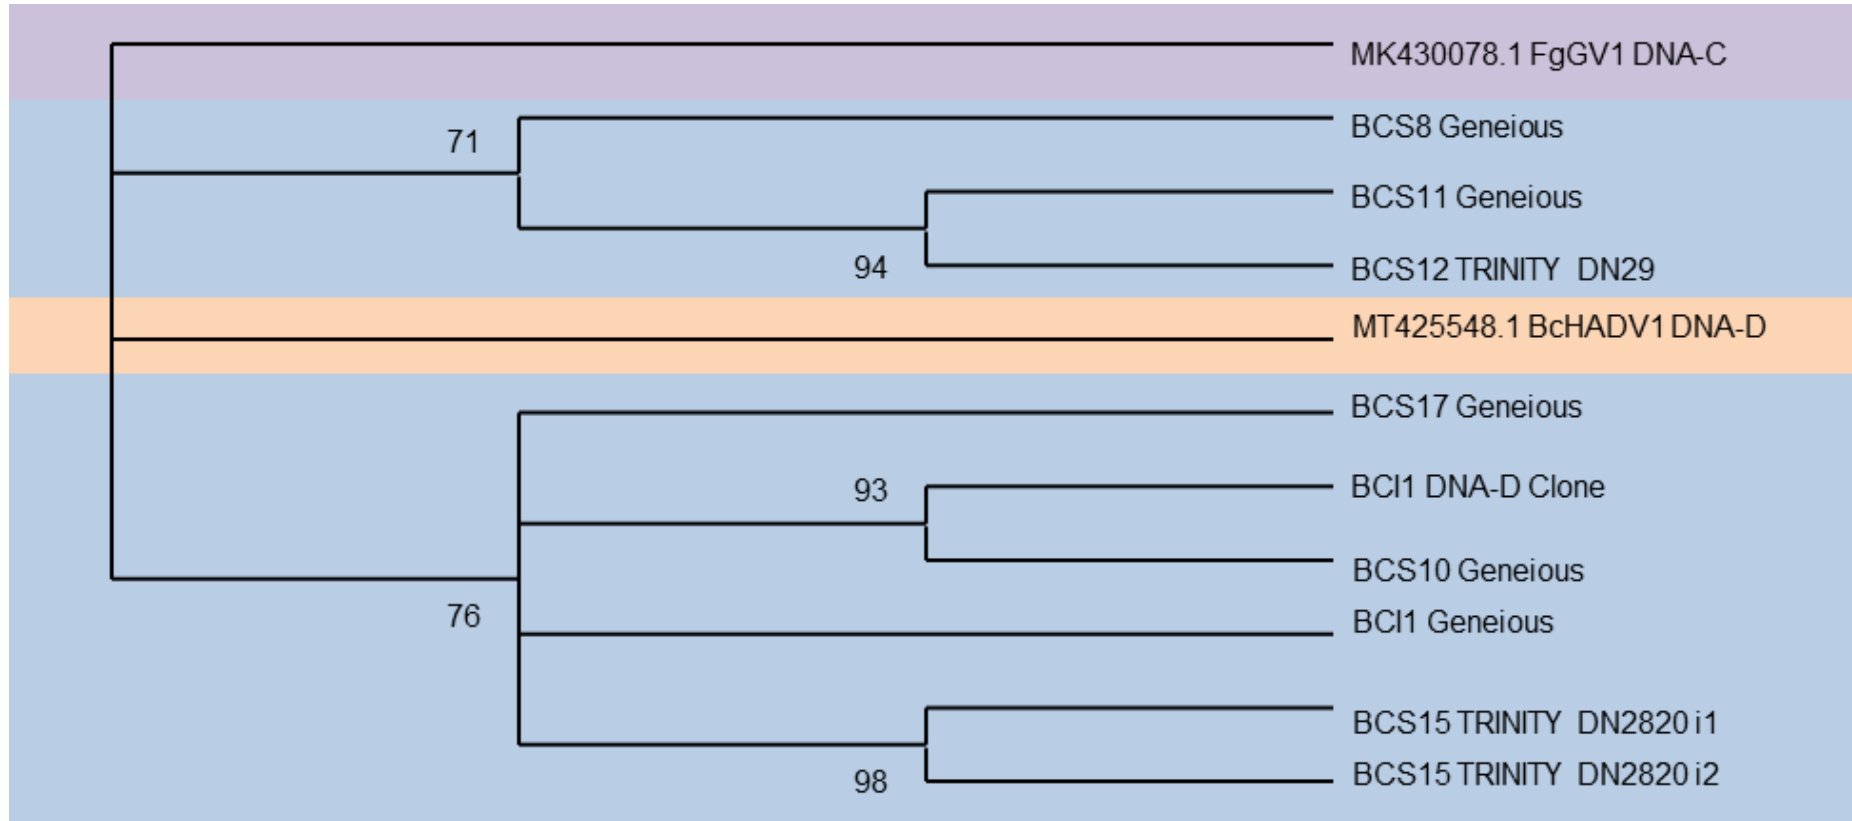

**Figure 7.** Phylogenetic tree based on nucleotide sequences of DNA-D. All bootstrap values (%) are represented at each node of the tree. A consensus tree was constructed from 1000 bootstrap trees (log likelihood of consensus tree: DNA-D, -3821.8583)

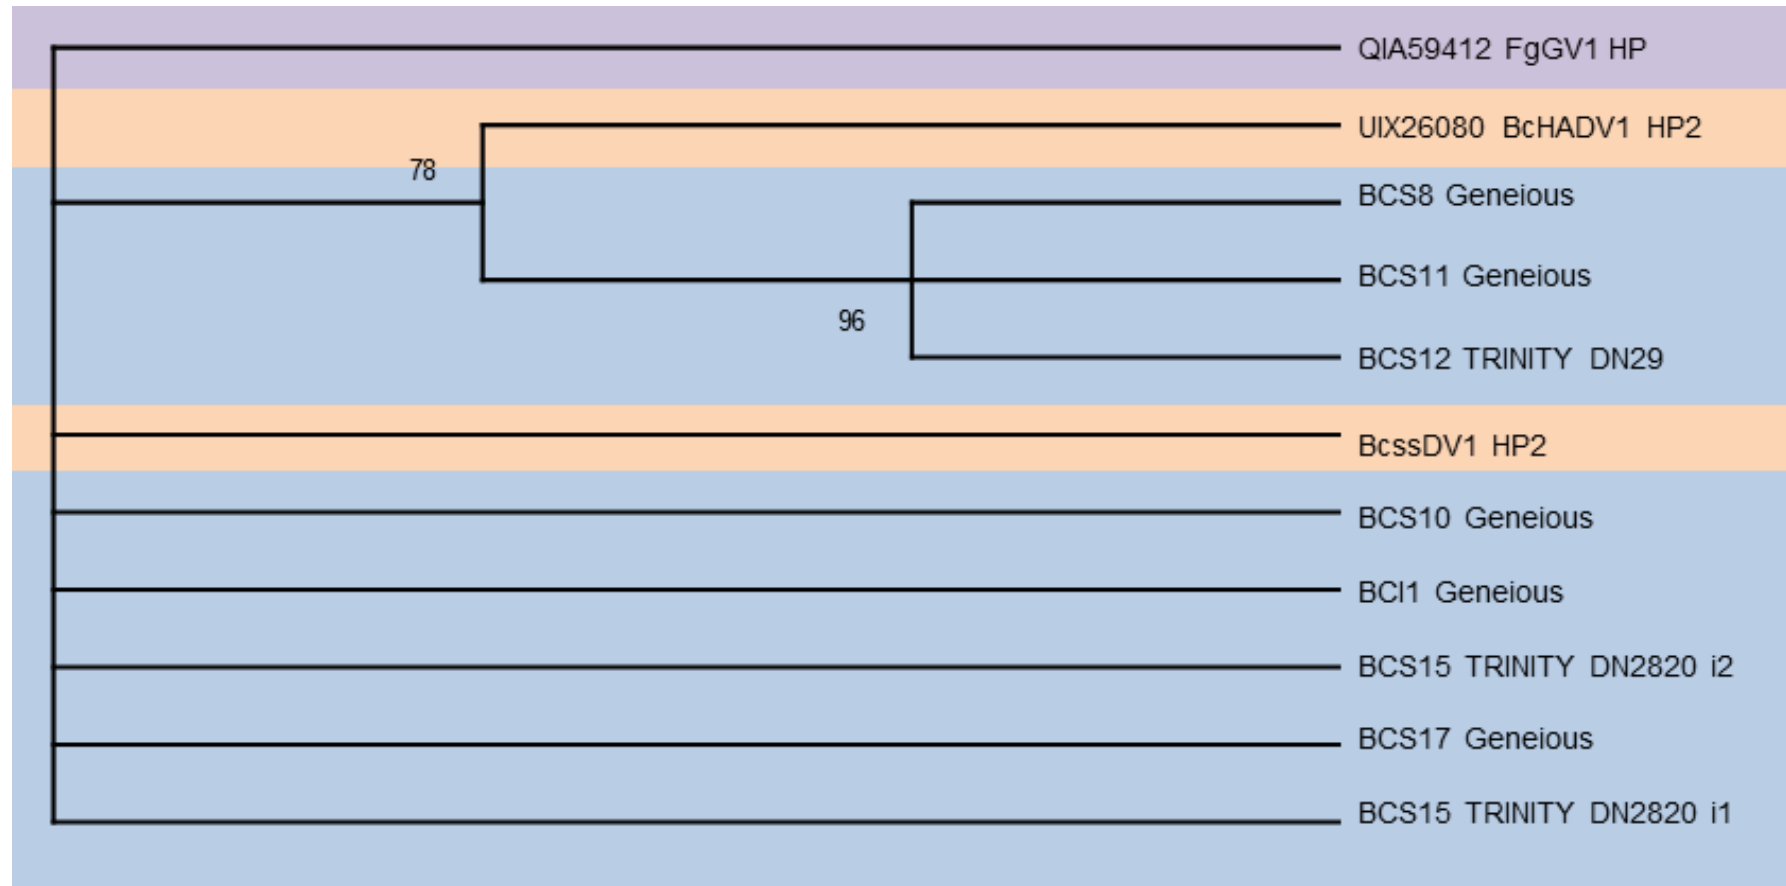

**Figure 8.** Phylogenetic tree based on amino acid sequences of DNA-D. All bootstrap values (%) are represented at each node of the tree. A consensus tree was constructed from 1000 bootstrap trees (log likelihood of consensus tree: DNA-D, -1652.9133)
