# Supplementary material for: Molecular characterization of a tetra segmented ssDNA virus infecting Botrytis cinerea worldwide
Source: Springer Nature journal article supplement (doi:10.1186/s12985-023-02256-z), 2023-12-19

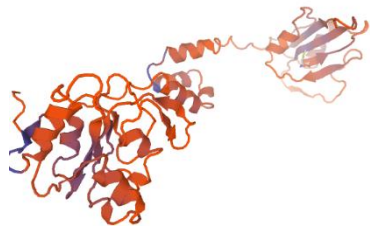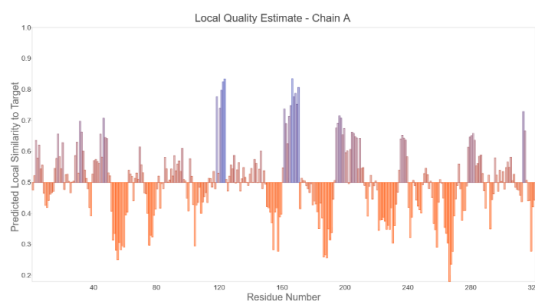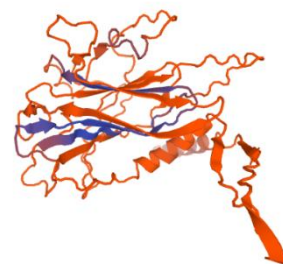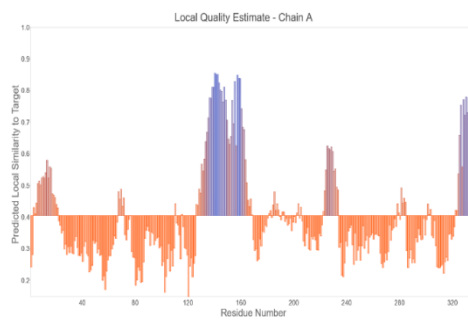

a)

b)

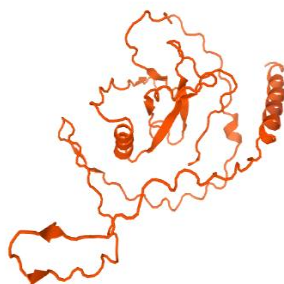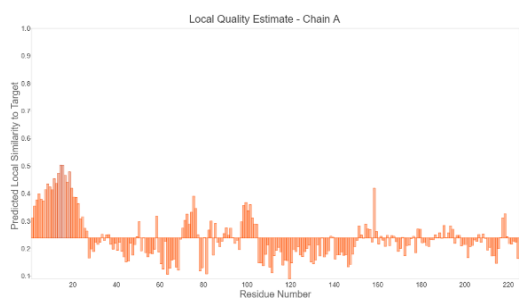

c)

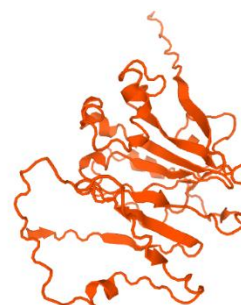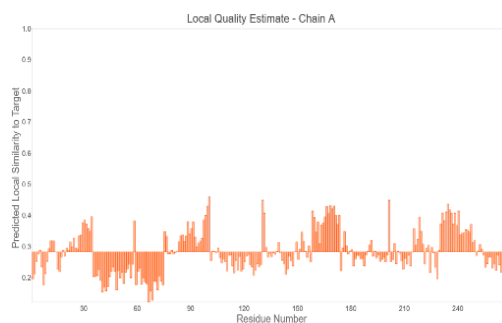

d)

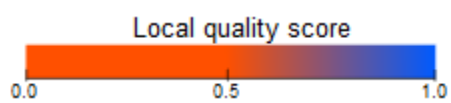

Supplement: MOESM3 [file 26547146]
