# Supplementary material for: Molecular characterization of a tetra segmented ssDNA virus infecting Botrytis cinerea worldwide
Source: Springer Nature journal article supplement (doi:10.1186/s12985-023-02256-z), 2023-12-19
Supplement: MOESM4 [file 26547146]

| Sample           | Phyre2 Results |                         |                                                                                               |                                                                                     |            |        |                                                                                                                                                                                                                                                                                                                                                                                           |
|------------------|----------------|-------------------------|-----------------------------------------------------------------------------------------------|-------------------------------------------------------------------------------------|------------|--------|-------------------------------------------------------------------------------------------------------------------------------------------------------------------------------------------------------------------------------------------------------------------------------------------------------------------------------------------------------------------------------------------|
| DNA-A<br>BcssDV1 | #              | Template                | Alignment Coverage                                                                            | 3D Model                                                                            | Confidence | % i.d. | Template Information                                                                                                                                                                                                                                                                                                                                                                      |
|                  | 1              | <a href="#">c6g1mA</a>  | 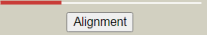 Alignment   |    | 99.9       | 28     | <b>PDB header:</b> replication<br><b>Chain:</b> A; <b>PDB Molecule:</b> replication-associated protein;<br><b>PDBTitle:</b> crystal structure of the wheat dwarf virus rep domain<br><b>PDB Entry:</b> <a href="#">PDBe</a> <a href="#">RCSB</a> <a href="#">PDBj</a>                                                                                                                     |
|                  | 2              | <a href="#">d115ia</a>  |  Alignment   |    | 99.9       | 26     | <b>Fold:</b> Origin of replication-binding domain, RBD-like<br><b>Superfamily:</b> Origin of replication-binding domain, RBD-like<br><b>Family:</b> DNA-binding domain of REP protein<br><b>PDB entry:</b> <a href="#">PDBe</a> <a href="#">RCSB</a> <a href="#">PDBj</a>                                                                                                                 |
|                  | 3              | <a href="#">c7om0C</a>  |  Alignment   |    | 98.8       | 17     | <b>PDB header:</b> replication<br><b>Chain:</b> C; <b>PDB Molecule:</b> dna primase;<br><b>PDBTitle:</b> structure of primase-helicase in sapi5<br><b>PDB Entry:</b> <a href="#">PDBe</a> <a href="#">RCSB</a> <a href="#">PDBj</a>                                                                                                                                                       |
| DNA-B<br>BcssDV1 | #              | Template                | Alignment Coverage                                                                            | 3D Model                                                                            | Confidence | % i.d. | Template Information                                                                                                                                                                                                                                                                                                                                                                      |
|                  | 1              | <a href="#">c2mx4A</a>  |  Alignment   |    | 40.6       | 52     | <b>PDB header:</b> translation,protein binding<br><b>Chain:</b> A; <b>PDB Molecule:</b> eukaryotic translation initiation factor 4e-binding protein<br><b>PDBTitle:</b> nmr structure of phosphorylated 4e-bp2<br><b>PDB Entry:</b> <a href="#">PDBe</a> <a href="#">RCSB</a> <a href="#">PDBj</a><br> |
|                  | 2              | <a href="#">c1v0eB</a>  |  Alignment  |   | 32.7       | 33     | <b>PDB header:</b> hydrolase<br><b>Chain:</b> B; <b>PDB Molecule:</b> endo-alpha-sialidase;<br><b>PDBTitle:</b> endosialidase of bacteriophage k1f<br><b>PDB Entry:</b> <a href="#">PDBe</a> <a href="#">RCSB</a> <a href="#">PDBj</a><br>                                                            |
|                  | 3              | <a href="#">d1v0ea1</a> |  Alignment |  | 29.0       | 33     | <b>Fold:</b> 6-bladed beta-propeller<br><b>Superfamily:</b> Sialidases<br><b>Family:</b> Endo-alpha-sialidase<br><b>PDB entry:</b> <a href="#">PDBe</a> <a href="#">RCSB</a> <a href="#">PDBj</a><br>                                                                                                |
|                  | 4              | <a href="#">c6wxoB</a>  |  Alignment |  | 27.1       | 46     | <b>PDB header:</b> de novo protein<br><b>Chain:</b> B; <b>PDB Molecule:</b> tfd-he;<br><b>PDBTitle:</b> de novo tim barrel-ferredoxin fold fusion homodimer with 2-histidine 2-glutamate centre tfd-he<br><b>PDB Entry:</b> <a href="#">PDBe</a> <a href="#">RCSB</a> <a href="#">PDBj</a><br>       |
|                  | 5              | <a href="#">c4hceA</a>  |  Alignment |  | 26.5       | 42     | <b>PDB header:</b> cell cycle<br><b>Chain:</b> A; <b>PDB Molecule:</b> cell division control protein 13;<br><b>PDBTitle:</b> crystal structure of the telomeric saccharomyces cerevisiae cdc13 ob22 domain<br><b>PDB Entry:</b> <a href="#">PDBe</a> <a href="#">RCSB</a> <a href="#">PDBj</a><br>   |
|                  | 6              | <a href="#">c4hizA</a>  |  Alignment |  | 25.3       | 33     | <b>PDB header:</b> hydrolase,viral protein<br><b>Chain:</b> A; <b>PDB Molecule:</b> endosialidase;<br><b>PDBTitle:</b> phage phi92 endosialidase<br><b>PDB Entry:</b> <a href="#">PDBe</a> <a href="#">RCSB</a> <a href="#">PDBj</a><br>                                                             |

DNA-B  
FgGV1

| # | Template                | Alignment Coverage | 3D Model | Confidence | % i.d. | Template Information                                                                                                                                                                                                                                                                                                                                                              |
|---|-------------------------|--------------------|----------|------------|--------|-----------------------------------------------------------------------------------------------------------------------------------------------------------------------------------------------------------------------------------------------------------------------------------------------------------------------------------------------------------------------------------|
| 1 | <a href="#">d1ofda3</a> |                    |          | 61.1       | 23     | <p><b>Fold:</b> Ntn hydrolase-like<br/> <b>Superfamily:</b> N-terminal nucleophile aminohydrolases (Ntn hydrolases)<br/> <b>Family:</b> Class II glutamine amidotransferases<br/> <b>PDB entry:</b> <a href="#">PDBe</a> <a href="#">RCSB</a> <a href="#">PDBj</a></p>                                                                                                            |
| 2 | <a href="#">d1ea0a3</a> |                    |          | 57.4       | 28     | <p><b>Fold:</b> Ntn hydrolase-like<br/> <b>Superfamily:</b> N-terminal nucleophile aminohydrolases (Ntn hydrolases)<br/> <b>Family:</b> Class II glutamine amidotransferases<br/> <b>PDB entry:</b> <a href="#">PDBe</a> <a href="#">RCSB</a> <a href="#">PDBj</a></p>                                                                                                            |
| 3 | <a href="#">c2lrqA</a>  |                    |          | 35.8       | 24     | <p><b>PDB header:</b>transcription<br/> <b>Chain:</b> A; <b>PDB Molecule:</b>nua4 complex subunit eaf3 homolog;<br/> <b>PDBTitle:</b> chemical shift assignment and solution structure of fr822a from2 drosophila melanogaster. northeast structural genomics consortium3 target fr822a<br/> <b>PDB Entry:</b> <a href="#">PDBe</a> <a href="#">RCSB</a> <a href="#">PDBj</a></p> |
| 4 | <a href="#">d3byqa1</a> |                    |          | 25.7       | 38     | <p><b>Fold:</b> Bacillus chorismate mutase-like<br/> <b>Superfamily:</b> BB2672-like<br/> <b>Family:</b> BB2672-like<br/> <b>PDB entry:</b> <a href="#">PDBe</a> <a href="#">RCSB</a> <a href="#">PDBj</a></p>                                                                                                                                                                    |
| 5 | <a href="#">c2cw1A</a>  |                    |          | 23.6       | 53     | <p><b>PDB header:</b>de novo protein<br/> <b>Chain:</b> A; <b>PDB Molecule:</b>sn4m;<br/> <b>PDBTitle:</b> solution structure of the de novo-designed lambda cro fold protein<br/> <b>PDB Entry:</b> <a href="#">PDBe</a> <a href="#">RCSB</a> <a href="#">PDBj</a></p>                                                                                                           |
| 6 | <a href="#">d2d0ta1</a> |                    |          | 22.1       | 18     | <p><b>Fold:</b> Indolic compounds 2,3-dioxygenase-like<br/> <b>Superfamily:</b> Indolic compounds 2,3-dioxygenase-like<br/> <b>Family:</b> Indoleamine 2,3-dioxygenase-like<br/> <b>PDB entry:</b> <a href="#">PDBe</a> <a href="#">RCSB</a> <a href="#">PDBj</a></p>                                                                                                             |

DNA-C  
BcssDV1

| # | Template               | Alignment Coverage | 3D Model | Confidence | % i.d. | Template Information                                                                                                                                                                                                                                                                                                           |
|---|------------------------|--------------------|----------|------------|--------|--------------------------------------------------------------------------------------------------------------------------------------------------------------------------------------------------------------------------------------------------------------------------------------------------------------------------------|
| 1 | <a href="#">c3c8xA</a> |                    |          | 89.3       | 27     | <p><b>PDB header:</b>transferase<br/> <b>Chain:</b> A; <b>PDB Molecule:</b>ephrin type-a receptor 2;<br/> <b>PDBTitle:</b> crystal structure of the ligand binding domain of human ephrin a22 (epha2) receptor protein kinase<br/> <b>PDB Entry:</b> <a href="#">PDBe</a> <a href="#">RCSB</a> <a href="#">PDBj</a></p>        |
| 2 | <a href="#">d1shwb</a> |                    |          | 82.9       | 37     | <p><b>Fold:</b> Galactose-binding domain-like<br/> <b>Superfamily:</b> Galactose-binding domain-like<br/> <b>Family:</b> Ephrin receptor ligand binding domain<br/> <b>PDB entry:</b> <a href="#">PDBe</a> <a href="#">RCSB</a> <a href="#">PDBj</a></p>                                                                       |
| 3 | <a href="#">c3p1c</a>  |                    |          | 74.3       | 32     | <p><b>PDB header:</b>transferase;signaling protein<br/> <b>Chain:</b> C; <b>PDB Molecule:</b>ephrin type-b receptor 3;<br/> <b>PDBTitle:</b> ligand binding domain of human ephrin type-b receptor 3<br/> <b>PDB Entry:</b> <a href="#">PDBe</a> <a href="#">RCSB</a> <a href="#">PDBj</a></p>                                 |
| 4 | <a href="#">c2qbxB</a> |                    |          | 73.6       | 31     | <p><b>PDB header:</b>signaling protein<br/> <b>Chain:</b> B; <b>PDB Molecule:</b>ephrin type-b receptor 2;<br/> <b>PDBTitle:</b> ephb2/snew antagonistic peptide complex<br/> <b>PDB Entry:</b> <a href="#">PDBe</a> <a href="#">RCSB</a> <a href="#">PDBj</a></p>                                                             |
| 5 | <a href="#">c7k7jA</a> |                    |          | 66.8       | 33     | <p><b>PDB header:</b>transferase<br/> <b>Chain:</b> A; <b>PDB Molecule:</b>ephrin type-b receptor 6;<br/> <b>PDBTitle:</b> ephb6 receptor ectodomain<br/> <b>PDB Entry:</b> <a href="#">PDBe</a> <a href="#">RCSB</a> <a href="#">PDBj</a></p>                                                                                 |
| 6 | <a href="#">c3mbwA</a> |                    |          | 62.4       | 34     | <p><b>PDB header:</b>transferase/signaling protein<br/> <b>Chain:</b> A; <b>PDB Molecule:</b>ephrin type-a receptor 2;<br/> <b>PDBTitle:</b> crystal structure of the human ephrin a2 lbd and crd domains in2 complex with ephrin a1<br/> <b>PDB Entry:</b> <a href="#">PDBe</a> <a href="#">RCSB</a> <a href="#">PDBj</a></p> |

DNA-C  
FgGV1

| # | Template                | Alignment Coverage | 3D Model | Confidence | % i.d. | Template Information                                                                                                                                                                                                                                                                                     |
|---|-------------------------|--------------------|----------|------------|--------|----------------------------------------------------------------------------------------------------------------------------------------------------------------------------------------------------------------------------------------------------------------------------------------------------------|
| 1 | <a href="#">d2v7fa1</a> |                    |          | 56.9       | 23     | <b>Fold:</b> DNA/RNA-binding 3-helical bundle<br><b>Superfamily:</b> "Winged helix" DNA-binding domain<br><b>Family:</b> Rps19E-like<br><b>PDB entry:</b> <a href="#">PDBe</a> <a href="#">RCSB</a> <a href="#">PDBJ</a><br>                                                                             |
| 2 | <a href="#">c5xauD</a>  |                    |          | 52.0       | 13     | <b>PDB header:</b> cell adhesion<br><b>Chain:</b> D; <b>PDB Molecule:</b> laminin subunit alpha-5;<br><b>PDBTitle:</b> crystal structure of integrin binding fragment of laminin-511<br><b>PDB Entry:</b> <a href="#">PDBe</a> <a href="#">RCSB</a> <a href="#">PDBJ</a><br>                             |
| 3 | <a href="#">c5xyIT</a>  |                    |          | 50.9       | 25     | <b>PDB header:</b> ribosome<br><b>Chain:</b> T; <b>PDB Molecule:</b> ribosomal protein s19e, putative;<br><b>PDBTitle:</b> small subunit of trichomonas vaginalis ribosome<br><b>PDB Entry:</b> <a href="#">PDBe</a> <a href="#">RCSB</a> <a href="#">PDBJ</a><br>                                       |
| 4 | <a href="#">c3j38T</a>  |                    |          | 47.5       | 45     | <b>PDB header:</b> ribosome<br><b>Chain:</b> T; <b>PDB Molecule:</b> 40s ribosomal protein s19a;<br><b>PDBTitle:</b> structure of the d. melanogaster 40s ribosomal proteins<br><b>PDB Entry:</b> <a href="#">PDBe</a> <a href="#">RCSB</a> <a href="#">PDBJ</a><br>                                     |
| 5 | <a href="#">c3j3aT</a>  |                    |          | 47.2       | 40     | <b>PDB header:</b> ribosome<br><b>Chain:</b> T; <b>PDB Molecule:</b> 40s ribosomal protein s19;<br><b>PDBTitle:</b> structure of the human 40s ribosomal proteins<br><b>PDB Entry:</b> <a href="#">PDBe</a> <a href="#">RCSB</a> <a href="#">PDBJ</a><br>                                                |
| 6 | <a href="#">c3zeyO</a>  |                    |          | 46.9       | 30     | <b>PDB header:</b> ribosome<br><b>Chain:</b> O; <b>PDB Molecule:</b> ribosomal protein s19, putative;<br><b>PDBTitle:</b> high-resolution cryo-electron microscopy structure of the trypanosoma2 brucei ribosome<br><b>PDB Entry:</b> <a href="#">PDBe</a> <a href="#">RCSB</a> <a href="#">PDBJ</a><br> |

DNA-D  
BcssDV1

| # | Template               | Alignment Coverage | 3D Model | Confidence | % i.d. | Template Information                                                                                                                                                                                                                                                                                                                   |
|---|------------------------|--------------------|----------|------------|--------|----------------------------------------------------------------------------------------------------------------------------------------------------------------------------------------------------------------------------------------------------------------------------------------------------------------------------------------|
| 1 | <a href="#">c3zxdD</a> |                    |          | 71.2       | 43     | <b>PDB header:</b> cell cycle<br><b>Chain:</b> D; <b>PDB Molecule:</b> ctf19;<br><b>PDBTitle:</b> crystal structure of the ctf19-mcm21 kinetochore heterodimer from 2 yeast<br><b>PDB Entry:</b> <a href="#">PDBe</a> <a href="#">RCSB</a> <a href="#">PDBJ</a><br>                                                                    |
| 2 | <a href="#">c5w65P</a> |                    |          | 62.4       | 18     | <b>PDB header:</b> transcription<br><b>Chain:</b> P; <b>PDB Molecule:</b> rna polymerase i-specific transcription initiation factor<br><b>PDBTitle:</b> rna polymerase i initial transcribing complex state 2<br><b>PDB Entry:</b> <a href="#">PDBe</a> <a href="#">RCSB</a> <a href="#">PDBJ</a><br>                                  |
| 3 | <a href="#">c5n5xN</a> |                    |          | 60.2       | 18     | <b>PDB header:</b> transcription<br><b>Chain:</b> N; <b>PDB Molecule:</b> rna polymerase i-specific transcription initiation factor<br><b>PDBTitle:</b> crystal structure of s. cerevisiae core factor at 3.2a resolution<br><b>PDB Entry:</b> <a href="#">PDBe</a> <a href="#">RCSB</a> <a href="#">PDBJ</a><br>                      |
| 4 | <a href="#">c6ohzA</a> |                    |          | 37.6       | 32     | <b>PDB header:</b> unknown function<br><b>Chain:</b> A; <b>PDB Molecule:</b> uncharacterized protein;<br><b>PDBTitle:</b> structure of an uncharacterized protein from leptospira borgpeterseni2 serovar hardjo-bovis (strain jb197)<br><b>PDB Entry:</b> <a href="#">PDBe</a> <a href="#">RCSB</a> <a href="#">PDBJ</a><br>           |
| 5 | <a href="#">c3mi6A</a> |                    |          | 36.8       | 23     | <b>PDB header:</b> hydrolase<br><b>Chain:</b> A; <b>PDB Molecule:</b> alpha-galactosidase;<br><b>PDBTitle:</b> crystal structure of the alpha-galactosidase from lactobacillus2 brevis, northeast structural genomics consortium target lbr11.<br><b>PDB Entry:</b> <a href="#">PDBe</a> <a href="#">RCSB</a> <a href="#">PDBJ</a><br> |

Additional file 4a. Results of structural homologies modelled by Phyre 2 in proteins of BcssDV1 and FgGV1.

| Sample           | DALI Results             |            |      |      |      |      |                        |                                                             |
|------------------|--------------------------|------------|------|------|------|------|------------------------|-------------------------------------------------------------|
| DNA-A<br>BcssDV1 | No:                      | Chain      | Z    | rmsd | lali | nres | %id PDB                | Description                                                 |
|                  | <input type="checkbox"/> | 1: 6q1m-A  | 12.5 | 2.3  | 97   | 119  | 24 <a href="#">PDB</a> | MOLECULE: REPLICATION-ASSOCIATED PROTEIN;                   |
|                  | <input type="checkbox"/> | 2: 4gdf-A  | 9.2  | 12.5 | 251  | 497  | 12 <a href="#">PDB</a> | MOLECULE: LARGE T ANTIGEN;                                  |
|                  | <input type="checkbox"/> | 3: 3bos-B  | 9.2  | 3.9  | 141  | 231  | 10 <a href="#">PDB</a> | MOLECULE: PUTATIVE DNA REPLICATION FACTOR;                  |
|                  | <input type="checkbox"/> | 4: 5zr1-A  | 9.1  | 5.8  | 142  | 494  | 11 <a href="#">PDB</a> | MOLECULE: ORIGIN RECOGNITION COMPLEX SUBUNIT 1;             |
|                  | <input type="checkbox"/> | 5: 2hw0-A  | 9.1  | 3.6  | 96   | 115  | 18 <a href="#">PDB</a> | MOLECULE: REPLICASE;                                        |
|                  | <input type="checkbox"/> | 6: 6pxk-K  | 8.8  | 3.6  | 135  | 429  | 13 <a href="#">PDB</a> | MOLECULE: ATP-DEPENDENT PROTEASE ATPASE SUBUNIT HSLU;       |
|                  | <input type="checkbox"/> | 7: 6h8o-A  | 8.8  | 2.6  | 82   | 95   | 15 <a href="#">PDB</a> | MOLECULE: REPLICATION-ASSOCIATED PROTEIN;                   |
|                  | <input type="checkbox"/> | 8: 7jsf-A  | 8.8  | 6.9  | 171  | 276  | 15 <a href="#">PDB</a> | MOLECULE: PROTEIN REP68;                                    |
|                  | <input type="checkbox"/> | 9: 7tts-D  | 8.7  | 6.3  | 145  | 463  | 12 <a href="#">PDB</a> | MOLECULE: CASEINOLYTIC PEPTIDASE B PROTEIN HOMOLOG;         |
|                  | <input type="checkbox"/> | 10: 5v8f-D | 8.5  | 3.5  | 125  | 456  | 10 <a href="#">PDB</a> | MOLECULE: DNA REPLICATION LICENSING FACTOR MCM2;            |
|                  | <input type="checkbox"/> | 11: 7jgr-D | 8.5  | 3.2  | 125  | 441  | 14 <a href="#">PDB</a> | MOLECULE: ORIGIN RECOGNITION COMPLEX SUBUNIT 2;             |
|                  | <input type="checkbox"/> | 12: 1l8q-A | 8.4  | 3.4  | 126  | 321  | 14 <a href="#">PDB</a> | MOLECULE: CHROMOSOMAL REPLICATION INITIATOR PROTEIN DNAA;   |
|                  | <input type="checkbox"/> | 13: 1ixs-B | 8.4  | 3.3  | 131  | 315  | 12 <a href="#">PDB</a> | MOLECULE: HOLLIDAY JUNCTION DNA HELICASE RUVA;              |
|                  | <input type="checkbox"/> | 14: 7uqj-A | 8.3  | 3.9  | 138  | 585  | 12 <a href="#">PDB</a> | MOLECULE: ATPASE HISTONE CHAPERONE YTA7;                    |
|                  | <input type="checkbox"/> | 15: 5j1s-A | 8.3  | 3.5  | 133  | 277  | 15 <a href="#">PDB</a> | MOLECULE: TORSIN-1A;                                        |
|                  | <input type="checkbox"/> | 16: 1g4a-E | 8.3  | 3.5  | 133  | 356  | 14 <a href="#">PDB</a> | MOLECULE: ATP-DEPENDENT HSL PROTEASE ATP-BINDING SUBUNIT    |
|                  | <input type="checkbox"/> | 17: 3pvs-D | 8.1  | 3.1  | 122  | 424  | 11 <a href="#">PDB</a> | MOLECULE: REPLICATION-ASSOCIATED RECOMBINATION PROTEIN A;   |
|                  | <input type="checkbox"/> | 18: 6iy8-A | 8.1  | 18.1 | 144  | 469  | 13 <a href="#">PDB</a> | MOLECULE: POSITIVE REGULATOR CAPR;                          |
|                  | <input type="checkbox"/> | 19: 6l1q-A | 8.1  | 3.9  | 138  | 267  | 14 <a href="#">PDB</a> | MOLECULE: CBBQ PROTEIN;                                     |
|                  | <input type="checkbox"/> | 20: 7mi1-A | 8.0  | 6.5  | 151  | 2628 | 10 <a href="#">PDB</a> | MOLECULE: CHIMERA PROTEIN OF DYNEIN AND ENDOLYSIN;          |
|                  | <input type="checkbox"/> | 21: 7mi8-A | 8.0  | 3.5  | 141  | 868  | 13 <a href="#">PDB</a> | MOLECULE: FUSION PROTEIN OF DYNEIN AND ENDOLYSIN;           |
|                  | <input type="checkbox"/> | 22: 7jpp-E | 8.0  | 3.0  | 123  | 406  | 15 <a href="#">PDB</a> | MOLECULE: ORIGIN RECOGNITION COMPLEX SUBUNIT 1;             |
|                  | <input type="checkbox"/> | 23: 5e7p-A | 7.9  | 6.0  | 134  | 719  | 10 <a href="#">PDB</a> | MOLECULE: CELL DIVISION CONTROL PROTEIN CDC48;              |
|                  | <input type="checkbox"/> | 24: 7apd-B | 7.9  | 6.2  | 152  | 289  | 14 <a href="#">PDB</a> | MOLECULE: REPLICATION PROTEIN E1;                           |
|                  | <input type="checkbox"/> | 25: 7vcs-A | 7.8  | 10.1 | 154  | 766  | 10 <a href="#">PDB</a> | MOLECULE: TRANSITIONAL ENDOPLASMIC RETICULUM ATPASE;        |
|                  | <input type="checkbox"/> | 26: 2qby-B | 7.8  | 3.1  | 130  | 368  | 17 <a href="#">PDB</a> | MOLECULE: CELL DIVISION CONTROL PROTEIN 6 HOMOLOG 1;        |
|                  | <input type="checkbox"/> | 27: 7w42-B | 7.7  | 4.3  | 154  | 402  | 9 <a href="#">PDB</a>  | MOLECULE: UNCHARACTERIZED ATPASE YJOB;                      |
|                  | <input type="checkbox"/> | 28: 8dr5-A | 7.7  | 7.2  | 136  | 646  | 12 <a href="#">PDB</a> | MOLECULE: REPLICATION FACTOR C SUBUNIT 1;                   |
|                  | <input type="checkbox"/> | 29: 7mi6-A | 7.6  | 12.0 | 167  | 2419 | 10 <a href="#">PDB</a> | MOLECULE: FUSION PROTEIN OF DYNEIN AND ENDOLYSIN;           |
|                  | <input type="checkbox"/> | 30: 6z1f-3 | 7.6  | 4.2  | 134  | 284  | 13 <a href="#">PDB</a> | MOLECULE: RIBULOSE BISPHOSPHATE CARBOXYLASE/OXYGENASE ACTIV |
|                  | <input type="checkbox"/> | 31: 7qo4-M | 7.6  | 12.8 | 189  | 421  | 12 <a href="#">PDB</a> | MOLECULE: 26S PROTEASOME REGULATORY SUBUNIT RPN1;           |
|                  | <input type="checkbox"/> | 32: 6mdm-D | 7.6  | 11.7 | 179  | 713  | 9 <a href="#">PDB</a>  | MOLECULE: VESICLE-FUSING ATPASE;                            |
|                  | <input type="checkbox"/> | 33: 7tjj-I | 7.5  | 3.2  | 116  | 380  | 10 <a href="#">PDB</a> | MOLECULE: ORIGIN RECOGNITION COMPLEX SUBUNIT 1;             |
|                  | <input type="checkbox"/> | 34: 6dgd-A | 7.5  | 4.6  | 126  | 704  | 10 <a href="#">PDB</a> | MOLECULE: PRIMOSOMAL PROTEIN N';                            |
|                  | <input type="checkbox"/> | 35: 1w5s-B | 7.5  | 3.3  | 133  | 396  | 14 <a href="#">PDB</a> | MOLECULE: ORIGIN RECOGNITION COMPLEX SUBUNIT 2 ORC2;        |

DNA-B  
BcssDV1

| No:                          | Chain  | Z   | rmsd | lali | nres | %id PDB                | Description                                                  |
|------------------------------|--------|-----|------|------|------|------------------------|--------------------------------------------------------------|
| <input type="checkbox"/> 1:  | 6f2s-H | 9.5 | 3.3  | 152  | 218  | 9 <a href="#">PDB</a>  | MOLECULE: CAPSID PROTEIN;                                    |
| <input type="checkbox"/> 2:  | 6s44-A | 8.8 | 3.6  | 123  | 146  | 12 <a href="#">PDB</a> | MOLECULE: CAPSID PROTEIN;                                    |
| <input type="checkbox"/> 3:  | 1r64-A | 8.7 | 10.4 | 132  | 481  | 4 <a href="#">PDB</a>  | MOLECULE: KEXIN;                                             |
| <input type="checkbox"/> 4:  | 4bcu-A | 8.4 | 4.1  | 149  | 188  | 11 <a href="#">PDB</a> | MOLECULE: COAT PROTEIN;                                      |
| <input type="checkbox"/> 5:  | 6qfo-A | 8.2 | 5.7  | 113  | 1348 | 10 <a href="#">PDB</a> | MOLECULE: PEGA DOMAIN-CONTAINING PROTEIN, PEGA DOMAIN-CONTAI |
| <input type="checkbox"/> 6:  | 2wq4-A | 8.0 | 2.9  | 109  | 134  | 8 <a href="#">PDB</a>  | MOLECULE: LECTIN;                                            |
| <input type="checkbox"/> 7:  | 2xom-A | 8.0 | 2.7  | 104  | 145  | 5 <a href="#">PDB</a>  | MOLECULE: ARABINOGALACTAN ENDO-1,4-BETA-GALACTOSIDASE;       |
| <input type="checkbox"/> 8:  | 5azx-A | 7.9 | 2.8  | 92   | 100  | 8 <a href="#">PDB</a>  | MOLECULE: TRANSMEMBRANE EMP24 DOMAIN-CONTAINING PROTEIN 10;  |
| <input type="checkbox"/> 9:  | 3afg-B | 7.6 | 5.7  | 130  | 507  | 5 <a href="#">PDB</a>  | MOLECULE: SUBTILISIN-LIKE SERINE PROTEASE;                   |
| <input type="checkbox"/> 10: | 3wso-A | 7.6 | 3.1  | 122  | 252  | 8 <a href="#">PDB</a>  | MOLECULE: F-BOX ONLY PROTEIN 44;                             |
| <input type="checkbox"/> 11: | 2gsy-E | 7.4 | 3.4  | 121  | 433  | 5 <a href="#">PDB</a>  | MOLECULE: POLYPROTEIN;                                       |
| <input type="checkbox"/> 12: | 5gu5-A | 7.3 | 2.8  | 93   | 108  | 9 <a href="#">PDB</a>  | MOLECULE: TRANSMEMBRANE EMP24 DOMAIN-CONTAINING PROTEIN 5;   |
| <input type="checkbox"/> 13: | 4qx1-A | 7.2 | 3.5  | 103  | 115  | 15 <a href="#">PDB</a> | MOLECULE: FLAGELLAR PROTEIN FLHE;                            |
| <input type="checkbox"/> 14: | 6yrf-A | 7.2 | 10.0 | 108  | 777  | 5 <a href="#">PDB</a>  | MOLECULE: VEGETATIVE INSECTICIDAL PROTEIN;                   |
| <input type="checkbox"/> 15: | 6vls-D | 7.1 | 11.6 | 106  | 963  | 7 <a href="#">PDB</a>  | MOLECULE: MALTOSSE/MALTODEXTRIN-BINDING PERIPLASMIC PROTEIN, |
| <input type="checkbox"/> 16: | 4z11-A | 7.0 | 4.8  | 116  | 513  | 6 <a href="#">PDB</a>  | MOLECULE: AURONE SYNTHASE;                                   |
| <input type="checkbox"/> 17: | 6wpx-B | 6.9 | 5.8  | 120  | 451  | 5 <a href="#">PDB</a>  | MOLECULE: BLEST2;                                            |
| <input type="checkbox"/> 18: | 4gwm-A | 6.9 | 6.0  | 126  | 561  | 9 <a href="#">PDB</a>  | MOLECULE: MEPRIN A SUBUNIT BETA;                             |
| <input type="checkbox"/> 19: | 5gka-A | 6.9 | 3.4  | 123  | 253  | 7 <a href="#">PDB</a>  | MOLECULE: CAPSID PROTEIN VP1;                                |
| <input type="checkbox"/> 20: | 8e2f-A | 6.6 | 3.0  | 106  | 771  | 8 <a href="#">PDB</a>  | MOLECULE: BACULOVIRAL IAP REPEAT-CONTAINING PROTEIN 6;       |
| <input type="checkbox"/> 21: | 4jdm-C | 6.6 | 3.1  | 108  | 269  | 10 <a href="#">PDB</a> | MOLECULE: VIRULENCE PLASMID PROTEIN PGP3-D;                  |
| <input type="checkbox"/> 22: | 3iii-A | 6.5 | 7.6  | 129  | 556  | 7 <a href="#">PDB</a>  | MOLECULE: COCE/NOND FAMILY HYDROLASE;                        |
| <input type="checkbox"/> 23: | 6yfe-A | 6.5 | 6.6  | 108  | 140  | 8 <a href="#">PDB</a>  | MOLECULE: GALACTOSE-BINDING LECTIN;                          |
| <input type="checkbox"/> 24: | 2c26-A | 6.5 | 7.9  | 117  | 250  | 9 <a href="#">PDB</a>  | MOLECULE: ENDOGLUCANASE;                                     |
| <input type="checkbox"/> 25: | 6e5c-A | 6.5 | 2.6  | 76   | 78   | 9 <a href="#">PDB</a>  | MOLECULE: DE NOVO BETA PROTEIN;                              |
| <input type="checkbox"/> 26: | 4k6b-B | 6.4 | 3.5  | 108  | 157  | 10 <a href="#">PDB</a> | MOLECULE: HS1 KNOB DOMAIN;                                   |
| <input type="checkbox"/> 27: | 6bqm-A | 6.4 | 14.0 | 107  | 460  | 11 <a href="#">PDB</a> | MOLECULE: SERINE PROTEASE VESC;                              |
| <input type="checkbox"/> 28: | 5ta1-A | 6.4 | 11.4 | 135  | 627  | 5 <a href="#">PDB</a>  | MOLECULE: GLYCOSIDE HYDROLASE;                               |
| <input type="checkbox"/> 29: | 6za2-B | 6.4 | 11.1 | 115  | 1083 | 3 <a href="#">PDB</a>  | MOLECULE: POR SECRETION SYSTEM PROTEIN PORU;                 |
| <input type="checkbox"/> 30: | 1auy-B | 6.4 | 4.1  | 123  | 189  | 8 <a href="#">PDB</a>  | MOLECULE: TURNIP YELLOW MOSAIC VIRUS;                        |
| <input type="checkbox"/> 31: | 1stm-A | 6.4 | 3.2  | 112  | 141  | 7 <a href="#">PDB</a>  | MOLECULE: SATELLITE PANICUM MOSAIC VIRUS;                    |
| <input type="checkbox"/> 32: | 5yvl-D | 6.4 | 3.2  | 106  | 206  | 9 <a href="#">PDB</a>  | MOLECULE: CYCLASE;                                           |
| <input type="checkbox"/> 33: | 7l2z-F | 6.4 | 3.2  | 114  | 664  | 9 <a href="#">PDB</a>  | MOLECULE: CYCLIC DI-GMP-BINDING PROTEIN;                     |
| <input type="checkbox"/> 34: | 6uwr-A | 6.4 | 13.5 | 117  | 660  | 6 <a href="#">PDB</a>  | MOLECULE: ADP-RIBOSYLTRANSFERASE BINDING COMPONENT;          |
| <input type="checkbox"/> 35: | 3pvm-B | 6.3 | 4.7  | 126  | 1225 | 8 <a href="#">PDB</a>  | MOLECULE: COMPLEMENT C5;                                     |
| <input type="checkbox"/> 36: | 4agg-A | 6.3 | 3.1  | 86   | 144  | 9 <a href="#">PDB</a>  | MOLECULE: GALECTIN;                                          |
| <input type="checkbox"/> 37: | 8des-A | 6.3 | 4.7  | 150  | 475  | 8 <a href="#">PDB</a>  | MOLECULE: MAJOR CAPSID PROTEIN;                              |
| <input type="checkbox"/> 38: | 6tku-A | 6.3 | 4.0  | 116  | 545  | 8 <a href="#">PDB</a>  | MOLECULE: DEPOLYMERASE KP32GP38;                             |
| <input type="checkbox"/> 39: | 6mkb-B | 6.3 | 3.1  | 114  | 165  | 6 <a href="#">PDB</a>  | MOLECULE: TUMOR NECROSIS FACTOR LIGAND SUPERFAMILY MEMBER 9  |
| <input type="checkbox"/> 40: | 6i56-A | 6.3 | 11.9 | 104  | 279  | 6 <a href="#">PDB</a>  | MOLECULE: PHAGE-LIKE ELEMENT PBSX PROTEIN XEPA;              |

DNA-C  
BcssDV1

| No:                          | Chain  | Z   | rmsd | lali | nres | %id PDB                | Description                                                 |
|------------------------------|--------|-----|------|------|------|------------------------|-------------------------------------------------------------|
| <input type="checkbox"/> 1:  | 7zel-A | 2.3 | 12.4 | 106  | 827  | 5 <a href="#">PDB</a>  | MOLECULE: SCHLAFEN FAMILY MEMBER 11;                        |
| <input type="checkbox"/> 2:  | 3ajv-A | 2.3 | 3.3  | 73   | 168  | 12 <a href="#">PDB</a> | MOLECULE: PUTATIVE UNCHARACTERIZED PROTEIN;                 |
| <input type="checkbox"/> 3:  | 5yh1-A | 2.3 | 9.4  | 75   | 439  | 7 <a href="#">PDB</a>  | MOLECULE: MEMBER OF S1P FAMILY OF RIBOSOMAL PROTEINS;       |
| <input type="checkbox"/> 4:  | 7or1-A | 2.2 | 4.1  | 65   | 2183 | 8 <a href="#">PDB</a>  | MOLECULE: RNA (5'-D(*(GTG))-R(P*AP*AP*UP*AP*CP*UP*AP*UP*AP* |
| <input type="checkbox"/> 5:  | 6qfj-A | 2.2 | 3.4  | 52   | 84   | 6 <a href="#">PDB</a>  | MOLECULE: MAGNETOSOME MEMBRANE PROTEIN MAMB, PUTATIVE CO/ZN |
| <input type="checkbox"/> 6:  | 3fov-A | 2.2 | 3.4  | 60   | 102  | 5 <a href="#">PDB</a>  | MOLECULE: UPF0102 PROTEIN RPA0323;                          |
| <input type="checkbox"/> 7:  | 5cet-A | 2.1 | 10.3 | 84   | 328  | 6 <a href="#">PDB</a>  | MOLECULE: BIFUNCTIONAL OLIGORIBONUCLEASE AND PAP PHOSPHATAS |
| <input type="checkbox"/> 8:  | 1u6z-B | 2.1 | 7.2  | 86   | 500  | 5 <a href="#">PDB</a>  | MOLECULE: EXOPOLYPHOSPHATASE;                               |
| <input type="checkbox"/> 9:  | 6gzb-A | 2.1 | 5.0  | 70   | 287  | 1 <a href="#">PDB</a>  | MOLECULE: SPORE GERMINATION PROTEIN GERM;                   |
| <input type="checkbox"/> 10: | 1n63-B | 2.1 | 4.1  | 63   | 805  | 2 <a href="#">PDB</a>  | MOLECULE: CARBON MONOXIDE DEHYDROGENASE SMALL CHAIN;        |

DNA-D  
BcssDV1

| No:                          | Chain  | Z   | rmsd | lali | nres | %id | PDB                 | Description                                                 |
|------------------------------|--------|-----|------|------|------|-----|---------------------|-------------------------------------------------------------|
| <input type="checkbox"/> 1:  | 6ya7-A | 4.2 | 4.5  | 90   | 350  | 7   | <a href="#">PDB</a> | MOLECULE: CELL DIVISION CYCLE 7-RELATED PROTEIN KINASE,CELL |
| <input type="checkbox"/> 2:  | 3u1w-C | 3.6 | 8.1  | 86   | 250  | 6   | <a href="#">PDB</a> | MOLECULE: HYPOTHETICAL PERIPLASMIC PROTEIN;                 |
| <input type="checkbox"/> 3:  | 3w0s-A | 3.5 | 5.5  | 83   | 298  | 12  | <a href="#">PDB</a> | MOLECULE: HYGROMYCIN-B 4-O-KINASE;                          |
| <input type="checkbox"/> 4:  | 7vnx-A | 3.5 | 4.4  | 89   | 216  | 11  | <a href="#">PDB</a> | MOLECULE: TKARKI;                                           |
| <input type="checkbox"/> 5:  | 6sum-A | 3.4 | 6.0  | 82   | 335  | 2   | <a href="#">PDB</a> | MOLECULE: AMICOUMACIN KINASE;                               |
| <input type="checkbox"/> 6:  | 7s3l-A | 3.2 | 4.8  | 72   | 254  | 11  | <a href="#">PDB</a> | MOLECULE: AMINOGLYCOSIDE PHOSPHOTRANSFERASE FAMILY PROTEIN; |
| <input type="checkbox"/> 7:  | 2xgl-A | 3.2 | 3.1  | 61   | 90   | 5   | <a href="#">PDB</a> | MOLECULE: COLICIN-M IMMUNITY PROTEIN;                       |
| <input type="checkbox"/> 8:  | 6c9j-A | 3.2 | 4.5  | 82   | 386  | 12  | <a href="#">PDB</a> | MOLECULE: 5'-AMP-ACTIVATED PROTEIN KINASE CATALYTIC SUBUNIT |
| <input type="checkbox"/> 9:  | 3i0o-A | 3.1 | 6.7  | 87   | 329  | 9   | <a href="#">PDB</a> | MOLECULE: SPECTINOMYCIN PHOSPHOTRANSFERASE;                 |
| <input type="checkbox"/> 10: | 5xzw-B | 3.1 | 6.8  | 101  | 379  | 6   | <a href="#">PDB</a> | MOLECULE: SERINE/THREONINE-PROTEIN KINASE RAD53;            |
| <input type="checkbox"/> 11: | 3ats-A | 3.1 | 5.5  | 80   | 352  | 5   | <a href="#">PDB</a> | MOLECULE: PUTATIVE UNCHARACTERIZED PROTEIN;                 |
| <input type="checkbox"/> 12: | 2q83-A | 3.1 | 7.4  | 88   | 332  | 5   | <a href="#">PDB</a> | MOLECULE: YTAA PROTEIN;                                     |
| <input type="checkbox"/> 13: | 5iqc-A | 3.1 | 6.5  | 88   | 301  | 5   | <a href="#">PDB</a> | MOLECULE: BIFUNCTIONAL AAC/APH;                             |
| <input type="checkbox"/> 14: | 4ocu-A | 3.0 | 5.8  | 90   | 356  | 8   | <a href="#">PDB</a> | MOLECULE: N-ACETYLHEXOSAMINE 1-PHOSPHATE KINASE;            |
| <input type="checkbox"/> 15: | 8gwe-A | 3.0 | 4.7  | 87   | 931  | 8   | <a href="#">PDB</a> | MOLECULE: RNA-DIRECTED RNA POLYMERASE;                      |
| <input type="checkbox"/> 16: | 5dzt-A | 3.0 | 12.1 | 114  | 886  | 5   | <a href="#">PDB</a> | MOLECULE: CYLM;                                             |
| <input type="checkbox"/> 17: | 2nyk-A | 3.0 | 8.2  | 90   | 237  | 7   | <a href="#">PDB</a> | MOLECULE: M157;                                             |
| <input type="checkbox"/> 18: | 3pgb-A | 2.9 | 6.3  | 98   | 740  | 4   | <a href="#">PDB</a> | MOLECULE: PUTATIVE UNCHARACTERIZED PROTEIN;                 |
| <input type="checkbox"/> 19: | 7s9w-B | 2.9 | 14.4 | 107  | 529  | 3   | <a href="#">PDB</a> | MOLECULE: DRMA;                                             |
| <input type="checkbox"/> 20: | 4hbr-A | 2.9 | 4.3  | 73   | 140  | 7   | <a href="#">PDB</a> | MOLECULE: PUTATIVE PERIPLASMIC PROTEIN;                     |
| <input type="checkbox"/> 21: | 5dzc-A | 2.9 | 17.5 | 95   | 816  | 4   | <a href="#">PDB</a> | MOLECULE: CGMP-DEPENDENT PROTEIN KINASE, PUTATIVE;          |
| <input type="checkbox"/> 22: | 6rkw-B | 2.9 | 21.6 | 75   | 781  | 3   | <a href="#">PDB</a> | MOLECULE: DNA GYRASE SUBUNIT A;                             |
| <input type="checkbox"/> 23: | 3bb9-B | 2.9 | 2.9  | 58   | 125  | 7   | <a href="#">PDB</a> | MOLECULE: PUTATIVE ORPHAN PROTEIN;                          |
| <input type="checkbox"/> 24: | 4lv8-A | 2.9 | 4.8  | 91   | 360  | 13  | <a href="#">PDB</a> | MOLECULE: RHOPTRY PROTEIN 5 C;                              |
| <input type="checkbox"/> 25: | 3dyp-A | 2.8 | 5.3  | 79   | 329  | 9   | <a href="#">PDB</a> | MOLECULE: PUTATIVE ACYL-COA DEHYDROGENASE;                  |
| <input type="checkbox"/> 26: | 4gki-A | 2.8 | 5.6  | 76   | 272  | 1   | <a href="#">PDB</a> | MOLECULE: AMINOGLYCOSIDE 3'-PHOSPHOTRANSFERASE APHA1-IAB;   |
| <input type="checkbox"/> 27: | 4ped-A | 2.8 | 6.2  | 100  | 387  | 8   | <a href="#">PDB</a> | MOLECULE: CHAPERONE ACTIVITY OF BC1 COMPLEX-LIKE, MITOCHOND |
| <input type="checkbox"/> 28: | 5ncl-A | 2.8 | 19.8 | 79   | 418  | 5   | <a href="#">PDB</a> | MOLECULE: SERINE/THREONINE-PROTEIN KINASE CBK1;             |
| <input type="checkbox"/> 29: | 7wb4-f | 2.8 | 7.2  | 78   | 321  | 6   | <a href="#">PDB</a> | MOLECULE: OUTER NUP133;                                     |
| <input type="checkbox"/> 30: | 5hl8-A | 2.8 | 2.8  | 49   | 81   | 8   | <a href="#">PDB</a> | MOLECULE: TYPE II SECRETION SYSTEM PROTEIN L;               |
| <input type="checkbox"/> 31: | 6dzk-Y | 2.8 | 3.1  | 60   | 103  | 8   | <a href="#">PDB</a> | MOLECULE: 16S RRNA;                                         |
| <input type="checkbox"/> 32: | 7zgr-A | 2.8 | 8.2  | 102  | 1253 | 3   | <a href="#">PDB</a> | MOLECULE: PROTEIN CFT1;                                     |

Additional file 4b. Results of structural homologies modelled by DALI in proteins of BcssDV1.
